# Supplementary material
Source: Research Square preprint supplement (doi:10.21203/rs.3.rs-9681939/v1)
Supplement: Supplementary file 1 [file 1e220e6e4073ac8ac6d34378.docx]

## Table 1 The search strings

| Scopus | TITLE-ABS-KEY ( ( "school disengagement" OR "student disengagement" OR "academic disengagement" OR "behavioral disengagement" OR "behavioural disengagement" OR "emotional disengagement" OR "cognitive disengagement" OR "low engagement" OR "school engagement" OR absenteeism OR "chronic absenteeism" OR truancy OR "school refusal" ) AND ( "dropout risk" OR "risk of dropout" OR "school dropout" OR "early school leaving" OR "early school dropout" OR "school completion" OR "school persistence" ) ) AND TITLE-ABS-KEY ( "primary school" OR "secondary school" OR "high school" OR "middle school" OR "K-12" OR "compulsory education" ) AND PUBYEAR > 2020 AND PUBYEAR < 2027 AND ( LIMIT-TO ( DOCTYPE , "ar" ) ) AND ( LIMIT-TO ( LANGUAGE , "English" ) )  Date of Access: March 2026 |
| --- | --- |
| WoS | TITLE-ABS-KEY ( ( "school disengagement" OR "student disengagement" OR "academic disengagement" OR "behavioral disengagement" OR "behavioural disengagement" OR "emotional disengagement" OR "cognitive disengagement" OR "low engagement" OR "school engagement" OR absenteeism OR "chronic absenteeism" OR truancy OR "school refusal" ) AND ( "dropout risk" OR "risk of dropout" OR "school dropout" OR "early school leaving" OR "early school dropout" OR "school completion" OR "school persistence" ) ) AND TITLE-ABS-KEY ( "primary school" OR "secondary school" OR "high school" OR "middle school" OR "K-12" OR "compulsory education" ) and 2021 or 2022 or 2023 or 2024 or 2025 (Publication Years) and Article (Document Types) and English (Languages)  Date of Access: March 2026 |
