# Supplementary material
Source: Research Square preprint supplement (doi:10.21203/rs.3.rs-9681939/v1)
Supplement: Supplementary file 2 [file 269e79963611661717fbc3c1.docx]

Table 7 Distribution of Consequences of School Disengagement in the Literature (n = 31)

| **Consequence Category** | **Outcomes Measured** | **n (out of 31)** | **Research Gaps** |
| --- | --- | --- | --- |
| Academic outcomes | Attendance, absenteeism, completion, academic performance, qualification attainment | 23 | Research focuses mainly on academic indicators, giving limited attention to wider consequences of disengagement. |
| Behavioural and psychological signals | Dropout intention, motivation, self-efficacy, emotional and behavioural risk indicators | 6 | Early warning indicators are widely studied but usually treated as predictors rather than outcomes. |
| Institutional outcomes | School discipline incidents, monitoring systems, reintegration processes, school climate | 6 | Institutional consequences are rarely measured directly and are usually examined only through academic outcomes. |
| Societal outcomes | Long-term economic productivity, substance use, legal problems, mental health outcomes | 3 | Broader societal impacts of dropout are mostly inferred rather than directly examined. |
