# Supplementary material
Source: Research Square preprint supplement (doi:10.21203/rs.3.rs-9681939/v1)
Supplement: Supplementary file 3 [file 53090293209c74eb3e05e072.docx]

Table 5. Operationalization of School Disengagement in the Reviewed Literature

| **Measurement Perspective** | **Operational Definition** | **Example Studies** |
| --- | --- | --- |
| Administrative indicators | Absenteeism, truancy, disciplinary incidents, and course failure from school records indicating observable behavioural participation. | Virtanen et al. (2021) and Çi̇men et al. (2025) |
| Administrative indicators during disruptions | Reduced learning participation during disruptions, such as lost instructional time or reduced classroom engagement. | Bennett (2022) |
| Psychosocial indicators | Internal detachment from schooling reflected through cynicism, loss of meaning, reduced motivation, and weaker sense of belonging. | Virtanen et al. (2021) |
| Learning engagement indicators | Participation in learning beyond attendance, measured through time-on-task, motivation, and task completion. | Combette et al. (2021) |
| Multidimensional engagement measures | Behavioural, emotional, and cognitive engagement measured using engagement profiles, self-report scales, and self-regulated learning indicators. | Estévez et al. (2021) and  Raufelder et al. (2026) |
