# Supplementary material
Source: Research Square preprint supplement (doi:10.21203/rs.3.rs-9681939/v1)
Supplement: Supplementary file 4 [file 6ef2c84c4b87f494c78bac32.docx]

## Table 4 Result of Assessment Performance for Selected Primary Studies.

| **No** | **Author** | **Country** | **Title** | **Q1** | **Q2** | **Q3** | **Q4** | **Q5** | **Q6** | **Total Mark** | **Percentage (%)** |
| --- | --- | --- | --- | --- | --- | --- | --- | --- | --- | --- | --- |
| 1 | Alan & Kubilay (2025) | Turkey | Empowering Adolescents to Transform Schools: Lessons from a Behavioral Targeting | 1 | 1 | 1 | 1 | 1 | 1 | 6 | 100 |
| 2 | Bennett (2022) | Canada & United States | School Snow Days, Absenteeism, and Student Achievement: A Comparative Study of Nova Scotia and Massachusetts | 1 | 1 | 0.5 | 0.5 | 0.5 | 0.5 | 4 | 66.7 |
| 3 | Bzour et al. (2022) | Palestine | Causes and remedies for secondary school dropout in Palestine | 1 | 1 | 0.5 | 0.5 | 0.5 | 0.5 | 4 | 66.7 |
| 4 | Çi̇men et al. (2025) | Turkey | Latent Profile and Network Analysis of School Attendance Problems in Adolescents: An Evaluation in Terms of Mental Health Issues, Academic Achievement, and School Dropout | 1 | 1 | 1 | 1 | 1 | 0.5 | 5.5 | 91.7 |
| 5 | Combette et al. (2021) | France | Identified Motivation as a Key Factor for School Engagement During the COVID-19 Pandemic-Related School Closure | 1 | 1 | 1 | 1 | 1 | 1 | 6 | 100 |
| 6 | Curran (2022) | Spain | Between consensus and conflict: Schools and parents negotiating the educational pathways of students at risk of early school leaving | 1 | 1 | 1 | 1 | 0.5 | 0.5 | 5 | 83.3 |
| 7 | Desalegn et al. (2021) | Ethiopia | The effect of school feeding programme on class absenteeism and academic performance of schoolchildren in Southern Ethiopia: A prospective cohort study | 1 | 1 | 1 | 1 | 1 | 1 | 6 | 100 |
| 8 | Estévez et al. (2021) | Spain | School engagement, academic achievement, and self-regulated learning | 1 | 1 | 1 | 1 | 1 | 0.5 | 5.5 | 91.7 |
| 9 | Evans & Ngatia (2021) | Kenya | School Uniforms, Short-Run Participation, and Long-Run Outcomes: Evidence from Kenya | 1 | 1 | 1 | 1 | 1 | 1 | 6 | 100 |
| 10 | Hoogsteder et al. (2021) | Netherlands | Professionals' and students' perceived needs for an online supportive application for reducing school absence and stimulating reintegration: Concept mapping study | 1 | 1 | 1 | 1 | 0.5 | 0.5 | 5 | 83.3 |
| 11 | Jiang et al. (2022) | United States | Teacher-student relationships and adolescents' school satisfaction: Behavioural engagement as a mechanism of change | 1 | 1 | 1 | 1 | 0.5 | 0.5 | 5 | 83.3 |
| 12 | Košir et al. (2023) | Albania | Application of school attachment factors as a strategy against school dropout: A case study of public school students in Albania | 1 | 1 | 1 | 1 | 0.5 | 0.5 | 5 | 83.3 |
| 13 | Larose et al. (2021) | United Kingdom | Childcare Attendance and Academic Achievement at Age 16 Years | 1 | 1 | 1 | 1 | 1 | 1 | 6 | 100 |
| 14 | McIntosh et al. (2021) | United States | Effects of an equity-focused PBIS approach to school improvement on exclusionary discipline and school climate | 1 | 1 | 1 | 1 | 1 | 1 | 6 | 100 |
| 15 | Min et al. (2022) | United States | Substance use and individual assets in urban adolescents: Subgroups and correlates in emerging adulthood | 1 | 1 | 1 | 1 | 1 | 1 | 6 | 100 |
| 16 | Musaddiq et al. (2024) | United States | Using Existing School Messaging Platforms to Inform Parents about Their Child’s Attendance | 1 | 1 | 1 | 1 | 1 | 0.5 | 5.5 | 91.7 |
| 17 | Nwogu et al. (2025) | Nigeria | Impact of Indiscipline on Students’ Academic Performance and School Management Strategies in Nigerian Public Secondary Schools | 1 | 1 | 1 | 1 | 0.5 | 0.5 | 5 | 83.3 |
| 18 | Nygaard & Ormiston (2024) | United States | An Exploratory Study Examining Student Social, Academic, and Emotional Behavior Across School Transitions | 1 | 1 | 1 | 0.5 | 0.5 | 0.5 | 4.5 | 75 |
| 19 | Oben & Hui (2025) | Cameroon | Discipline or damage?: Students' experiences of corporal punishment in Cameroon secondary schools and implications for education | 1 | 1 | 1 | 1 | 0.5 | 1 | 5.5 | 91.7 |
| 20 | Piscitello et al. (2022) | United States | Sociodemographic risk, school engagement, and community characteristics: A mediated approach to understanding high school dropout | 1 | 1 | 1 | 1 | 1 | 0.5 | 5.5 | 91.7 |
| 21 | Pov et al. (2022) | Cambodia | Identifying causes of lower secondary school dropout in Cambodia: a two-level hierarchical linear model | 1 | 1 | 1 | 1 | 1 | 1 | 6 | 100 |
| 22 | Ramsdal & Wynn (2024) | Norway | Do Two Weeks in a Learning Camp after Ninth Grade Make a Difference? Experiences of Demotivated Boys with an Increased Risk of School Dropout | 1 | 1 | 1 | 1 | 0.5 | 1 | 5.5 | 91.7 |
| 23 | Raufelder et al. (2026) | Finland & Germany | Engaging students in school: Two studies on the benefits of social support and high self-beliefs | 1 | 1 | 1 | 1 | 1 | 0.5 | 5.5 | 91.7 |
| 24 | K. Robson et al. (2022) | Canada | A Comparison of High School Graduation Predictors Between Two Ontario Student Cohorts | 1 | 1 | 1 | 1 | 1 | 1 | 6 | 100 |
| 25 | Sundelin et al. (2023) | Sweden | Young People’s Stories of School Failure and Remedial Pathways–Clues to Prevention of School Absenteeism and Early School Leaving | 1 | 1 | 1 | 1 | 0.5 | 0.5 | 5 | 83.3 |
| 26 | Ubochi et al. (2023) | Nigeria | Menstruation behaviour influencer model: a grounded theory of menstrual experiences of shame, embarrassment, stigma and absenteeism among pubescent girls in semi-urban and rural secondary schools in Enugu State, Nigeria | 1 | 1 | 1 | 1 | 0.5 | 1 | 5.5 | 91.7 |
| 27 | Vinas-Forcade et al. (2021) | Uruguay | Can failure be prevented? Using longitudinal data to identify at-risk students upon entering secondary school | 1 | 1 | 1 | 1 | 1 | 0.5 | 5.5 | 91.7 |
| 28 | Virtanen et al. (2022) | Finland | Stability of social support during school transitions: Associations with truancy and not completing upper secondary education in normative time | 1 | 1 | 1 | 1 | 1 | 1 | 6 | 100 |
| 29 | Virtanen et al. (2021) | Finland | Student engagement, truancy, and cynicism: A longitudinal study from primary school to upper secondary education | 1 | 1 | 1 | 1 | 1 | 1 | 6 | 100 |
| 30 | Williams et al. (2023) | United States | Student Engagement Among High School English Learners with Reading Comprehension Difficulties | 1 | 1 | 1 | 1 | 1 | 1 | 6 | 100 |
| 31 | Zava et al. (2022) | Italy | Academic Aspirations and Dropout Intentions in the Perspective of Positive Youth Development: Protective Factors in Adolescence | 1 | 1 | 1 | 1 | 0.5 | 0.5 | 5 | 83.3 |
