# Supplementary material
Source: Research Square preprint supplement (doi:10.21203/rs.3.rs-9681939/v1)
Supplement: Supplementary file 5 [file af68521ccd60710b27eb6b67.docx]

Table 8 Summary of the main intervention approaches and their outcomes.

| **Intervention Type** | **Outcomes** | **Studies** | **Limitation** |
| --- | --- | --- | --- |
| Behavioural nudges and parental messaging | Reduces absenteeism in the short term. | Musaddiq et al. (2024) | Effects are modest and mostly short-term. |
| Material support interventions | School uniforms increase attendance but have weaker long-term academic effects. | Evans & Ngatia (2021) | Limited evidence of sustained impact. |
| School welfare programmes | School feeding improves attendance with modest learning gains. | Desalegn et al. (2021) | Evidence focuses mainly on participation. |
| School climate and discipline interventions | Behavioural targeting and PBIS improve school climate and reduce exclusionary discipline. | Alan & Kubilay (2025); McIntosh et al. (2021) | Limited evidence of long-term dropout reduction. |
| Relational and mentoring support | Teacher and peer support stabilise engagement during transitions. | Raufelder et al. (2026) | Effects vary across contexts. |
| Mentoring programmes | Large mentoring programmes show limited impact on engagement and attendance. | Williams et al. (2023) | Evidence remains weak or inconsistent. |
| Motivational and learning interventions | Learning camps improve motivation, self-regulation, and peer relationships. | Ramsdal & Wynn (2024) | Long-term effects on dropout remain unclear. |
| Integrated monitoring and reintegration systems | Digital monitoring systems coordinate responses among schools, families, and professionals. | Hoogsteder et al. (2021) | Long-term effectiveness remains untested. |
