# Supplementary material
Source: Research Square preprint supplement (doi:10.21203/rs.3.rs-9681939/v1)
Supplement: Supplementary file 6 [file c1f5a34a9b9ab70cb7b75615.docx]

Table 2 The Selection Criterion is Searching

| Criterion | Inclusion | Exclusion |
| --- | --- | --- |
| Language | English | Non-English |
| Timeline | 2021 - 2026 | < 2021 |
| Document type | Journal (Article) | Conference papers, books, reviews, in-press articles. |
