# Supplementary material
Source: Research Square preprint supplement (doi:10.21203/rs.3.rs-9681939/v1)
Supplement: Supplementary file 7 [file ce6d8b20eff693e7f687b7fa.docx]

Table 3. Thematic Analysis Procedure

| **Analytical Stage** | **Description of Process** |
| --- | --- |
| Data familiarisation | Full-text articles were read several times to understand how disengagement and dropout were defined and measured. Notes were recorded on key definitions, indicators, and measurement approaches. |
| Initial coding | Key concepts related to disengagement and dropout were identified and coded. Examples included absenteeism, truancy, cynicism toward school, loss of meaning in schooling, and time-on-task. |
| Category development | Similar codes were grouped into broader categories to identify patterns in how disengagement was conceptualised and measured. Categories included administrative indicators, psychosocial indicators, and learning engagement indicators. |
| Theme development | The categories were combined into broader themes that reflected common patterns across the reviewed studies. |
| Interpretative synthesis | The themes were interpreted within broader educational contexts, linking disengagement processes to institutional practices, systemic conditions, and patterns of dropout risk in the literature. |
