# Supplementary material
Source: Research Square preprint supplement (doi:10.21203/rs.3.rs-9681939/v1)
Supplement: Supplementary file 8 [file e735b7e69362ab276e6d91a5.docx]

Table 6 Distribution of Factors Associated with School Disengagement in the Literature (n = 31)

| **Factor Level** | **Factors** | **n (out of 31)** | **Research Gaps** |
| --- | --- | --- | --- |
| Individual / Micro | Student behaviour, motivation, psychosocial indicators | 10 | Disengagement is largely framed as a student-level issue, with limited attention to institutional drivers. |
| School / Meso | School climate, disciplinary practices, teacher–student relationships | 7 | The role of school management and institutional responses remains underexplored. |
| Family / Household | Socioeconomic status, parental supervision, home–school interaction | 3 | Family factors are often treated as control variables rather than central mechanisms. |
| Structural / Macro | Policy context, community conditions, structural inequalities | 7 | Structural influences are acknowledged but rarely integrated into intervention frameworks. |
| Multilevel | Combined student–school–family analytical models | 4 | Explicit ecological or multilevel approaches remain limited despite their relevance for systemic solutions. |
